# Supplementary material for: Diverse Taxonomies for Diverse Chemistries: Enhanced Representation of Natural Product Metabolism in UniProtKB
Source: Metabolites. 2021 Jan 12;11(1):48. doi: 10.3390/metabo11010048 (PMC7827101; doi:10.3390/metabo11010048)
Supplement: Supplementary file 1 [file metabolites-11-00048-s001.pdf]

## Diverse taxonomies for diverse chemistries: enhanced representation of natural product metabolism in UniProtKB

Supplementary Table S1. Novel families of enzymes curated in UniProtKB/Swiss-Prot but not specifically represented in InterPro.

| Protein family <sup>a</sup> | Function                    | Swiss-Prot <sup>b</sup> | Swiss-Prot-Rhea <sup>c</sup> | Link to UniProtKB (query on uniprot.org)            |
|-----------------------------|-----------------------------|-------------------------|------------------------------|-----------------------------------------------------|
| <b>paxM</b>                 | FAD-dependent monooxygenase | 77                      | 8                            | family:"paxm fad-dependent monooxygenase family"    |
| <b>lovG</b>                 | esterase                    | 29                      | 4                            | family:"lovg family"                                |
| <b>avfA</b>                 | oxidoreductase              | 20                      | 0                            | family:"avfa family"                                |
| <b>paxB</b>                 | terpene cyclase             | 17                      | 3                            | family:"paxb family"                                |
| <b>tpcK</b>                 | decarboxylase               | 16                      | 9                            | family:"tpck family" AND reviewed:yes               |
| <b>Ascl /paxA</b>           | terpene cyclase             | 12                      | 2                            | family:"paxa family"                                |
| <b>easN</b>                 | O-acetyltransferase         | 11                      | 2                            | family:"fumigaclavine b o-acetyltransferase family" |
| <b>mdpH-2</b>               | anthrone oxygenase          | 10                      | 7                            | family:"anthrone oxygenase family"                  |
| <b>AMT4</b>                 | thioesterase                | 9                       | 0                            | family:"amt4 thioesterase family"                   |
| <b>asaB</b>                 | oxidoreductase              | 9                       | 0                            | family:"asab hydroxylase desaturase family"         |
| <b>OpS7</b>                 | oxidoreductase              | 7                       | 0                            | family:"oxidoreductase ops7 family"                 |
| <b>bfoA</b>                 | acetyltransferase           | 5                       | 0                            | family:"bfoa family"                                |
| <b>ltsm</b>                 | ND                          | 2                       | 0                            | family:"ltms family"                                |

<sup>a</sup>The name of one representative member is used to name each family. <sup>b</sup>Number of proteins curated in UniProtKB/Swiss-Prot. <sup>c</sup>Number of UniProtKB/Swiss-Prot proteins with annotated Rhea reactions.

UniProtKB 2020\_05 results

Filter by: Reviewed (31) Swiss-Prot, Unreviewed (159) TrEMBL, Popular organisms, PENEN (32), Penicillium vulpinum (4), Penicillium solitum (5)

| Entry      | Entry name | Protein names                      | Gene names       | Organism                                                                            | Length |
|------------|------------|------------------------------------|------------------|-------------------------------------------------------------------------------------|--------|
| A0A075TRK9 | PATE_PENEN | Patulin synthase                   | patE PEX2_082770 | Penicillium expansum (Blue mold rot fungus)                                         | 628    |
| B6RAL1     | PATM_PENEN | ABC transporter patM               | patM PEX2_082820 | Penicillium expansum (Blue mold rot fungus)                                         | 1,394  |
| A1CFL2     | PATE_ASPCL | Patulin synthase                   | patE ACLA_093600 | Aspergillus clavatus (strain ATCC 1007 / CBS 513.65 / DSM 816 / NCTC 3887 / NRRL 1) | 628    |
| A0A075TMP8 | PATI_PENEN | Cytochrome P450 monooxygenase patI | patI PEX2_082860 | Penicillium expansum (Blue mold rot fungus)                                         | 526    |
| A0A075TRL5 | PATH_PENEN | Cytochrome P450 monooxygenase patH | patH PEX2_082740 | Penicillium expansum (Blue mold rot fungus)                                         | 524    |

**Supplementary Figure S1. Sample of the UniProt website simple search tool.** Simple search to mine the UniProtKB content. The request used here was: [www.uniprot.org/uniprot/?query=patulin](https://www.uniprot.org/uniprot/?query=patulin). This leads to the retrieval of UniProtKB entries containing the term “patulin”.

## View by

Results table

Taxonomy

Keywords

Gene Ontology

Enzyme class

Pathway

Search:

- Meyerozyma caribbica (1 results)
- ☐ leotiomyces (189 results)
- ☐ Eurotiales (green and blue molds) (183 results)
- ☐ Aspergillaceae (168 results)
- ☐ Byssoschlamys (15 results)
- ☐ Hypocreomycetidae (4 results)
- Colletotrichum higginsianum (1 results)
- ☐ Fusarium (3 results)
- Lasiodiplodia theobromae (2 results)

**Supplementary Figure S2. Filtering a simple search result on the UniProt website, use of view option.** A filter is dedicated to view options following a simple search in UniProtKB. The request used here was: [www.uniprot.org/uniprot/?query=patulin](https://www.uniprot.org/uniprot/?query=patulin). This leads to the retrieval of UniProtKB entries containing the term “patulin”. The filter selected leads to a display by taxonomy, permitting to scroll over the tree of life within the search result.

# Popular organisms

PENPA (1)

PENEN (14)

Penicillium expansum

ASPCL (12)

**Supplementary Figure S3. Filtering a simple search result on the UniProt website, restricting search results to suggested organisms.** A filter is dedicated to popular organism selection following a search in UniProtKB. The request used here was: [www.uniprot.org/uniprot/?query=patulin](http://www.uniprot.org/uniprot/?query=patulin). This leads to the retrieval of UniProtKB entries containing the term “patulin”. The filter selected leads to a restriction of the search to *Penicillium expansum* via the “PENEN” option (its mnemonic species identification code [www.uniprot.org/help/entry\\_name](http://www.uniprot.org/help/entry_name)).

## Customize results table

[? About UniProtKB](#)

Columns to be displayed<sup>i</sup>

[Reset to default](#)

[Save](#)

[Cancel](#)

Drag and drop to re-order.

|       |            |                                                                                     |               |            |          |        |                      |
|-------|------------|-------------------------------------------------------------------------------------|---------------|------------|----------|--------|----------------------|
| Entry | Entry name | 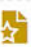 | Protein names | Gene names | Organism | Length | Subcellular location |
|-------|------------|-------------------------------------------------------------------------------------|---------------|------------|----------|--------|----------------------|

**Supplementary Figure S4. Personalizing the content displayed in each column of the UniProtKB website.** The custom result table tool of the UniProt website allows to define which to display in columns. Selected columns are “Entry” ([www.uniprot.org/help/accession\\_numbers](http://www.uniprot.org/help/accession_numbers)), “Entry Name” ([www.uniprot.org/help/entry\\_name](http://www.uniprot.org/help/entry_name)), “Review status” (Swiss-Prot manually curated in yellow, TrEMBL automatic entries in blue, ([www.uniprot.org/help/entry\\_status](http://www.uniprot.org/help/entry_status)), “Protein names” ([www.uniprot.org/help/protein\\_names](http://www.uniprot.org/help/protein_names)), “Gene names” ([www.uniprot.org/help/gene\\_name](http://www.uniprot.org/help/gene_name)), “Organism” ([www.uniprot.org/help/organism-name](http://www.uniprot.org/help/organism-name)), “Length” (protein sequence length in amino-acids) and “Subcellular location” ([www.uniprot.org/help/subcellular\\_location\\_section](http://www.uniprot.org/help/subcellular_location_section)).

| Gene names 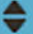 | Subcellular location [CC] 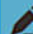                                                                                                                                                                                                                                                                                                                                                                                                                                                                                                                                                                                                                                                                                                                                   |
|----------------------------------------------------------------------------------------------|-------------------------------------------------------------------------------------------------------------------------------------------------------------------------------------------------------------------------------------------------------------------------------------------------------------------------------------------------------------------------------------------------------------------------------------------------------------------------------------------------------------------------------------------------------------------------------------------------------------------------------------------------------------------------------------------------------------------------------------------------------------------------------------------------------------------------------------------------|
| <b>patK</b><br>PEX2_082880                                                                   | <ul style="list-style-type: none"> <li>cytosol 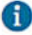 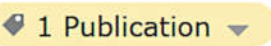</li> </ul>                                                                                                                                                                                                                                                                                                                                                                                                                                                                                                                                                                                                                   |
| <b>patI</b><br>PEX2_082860                                                                   | <ul style="list-style-type: none"> <li>Endoplasmic reticulum membrane 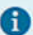 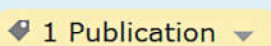 ;</li> <li>Single-pass membrane protein 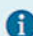 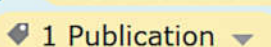</li> </ul>                                                                                                                                                                                                                                                                                                                                                                          |
| <b>patB</b><br>PEX2_082800                                                                   | <ul style="list-style-type: none"> <li>cytosol 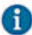 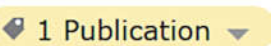</li> </ul>                                                                                                                                                                                                                                                                                                                                                                                                                                                                                                                                                                                                                   |
| <b>patH</b><br>PEX2_082740                                                                   | <ul style="list-style-type: none"> <li>Endoplasmic reticulum membrane 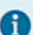 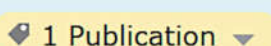 ;</li> <li>Single-pass membrane protein 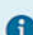 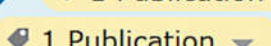</li> </ul>                                                                                                                                                                                                                                                                                                                                                                          |
| <b>patO</b><br>PEX2_082840                                                                   | <ul style="list-style-type: none"> <li>Vacuole lumen 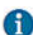 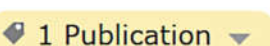</li> </ul>                                                                                                                                                                                                                                                                                                                                                                                                                                                                                                                                                                                                            |
| <b>patM</b><br>PEX2_082820                                                                   | <ul style="list-style-type: none"> <li>Vacuole membrane 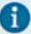 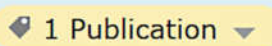 ; Multi-pass membrane protein 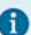 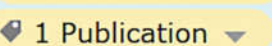</li> <li>Cell membrane 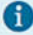 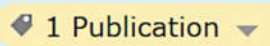 ; Multi-pass membrane protein 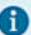 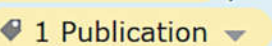</li> </ul> |

**Supplementary Figure S5. Details on result columns of a simple search result on the UniProt website.** Focus on result columns dedicated to gene names and subcellular location following a search in UniProtKB. The request at uniprot.org used here was: pathway:478.918 patulin AND organism:"*Penicillium expansum* (Blue mold rot fungus) [27334]".

UniProtKB pathway:478.918 patulin AND organism:"Penicillium expansum (Blue mold rot fungus) [27334]"

UniProtKB 2020\_06 results

Filter by: Reviewed (14) Popular organisms: PENEN (14) Proteomes: UP000030143 (14)

Download selected (0) Download all (14) Format: FASTA (canonical) FASTA (canonical & isoform) Tab-separated Excel XML RDF/XML Text GFF List

| Entry      | Entry Name | Gene names       | Organism                                    | Length |
|------------|------------|------------------|---------------------------------------------|--------|
| A0A075TRC0 | PATK       | patK PEX2_082880 | Penicillium expansum (Blue mold rot fungus) | 1,776  |
| A0A075TMP8 | PATI       | patI PEX2_082860 | Penicillium expansum (Blue mold rot fungus) | 526    |
| A0A075TXZ3 | PATB       | patB PEX2_082800 | Penicillium expansum (Blue mold rot fungus) | 561    |
| A0A075TRL5 | PATH_PENEN | patH PEX2_082740 | Penicillium expansum (Blue mold rot fungus) | 524    |
| A0A075TR33 | PATO_PENEN | patO PEX2_082840 | Penicillium expansum (Blue mold rot fungus) | 571    |
| B6RAL1     | PATM_PENEN | patM PEX2_082820 | Penicillium expansum (Blue mold rot fungus) | 1,394  |
| A0A075TMP0 | PATD_PENEN | patD PEX2_082800 | Penicillium expansum (Blue mold rot fungus) | 340    |

**Supplementary Figure S6. Downloading the result of a simple search result on the UniProt website.** Various download possibilities following a search in UniProtKB. The request used here was: pathway:478.918 patulin AND organism:"Penicillium expansum (Blue mold rot fungus) [27334]". Displayed columns are "Entry" (www.uniprot.org/help/accession\_numbers), "Entry Name" (www.uniprot.org/help/entry\_name), "Review status" (Swiss-Prot manually curated in yellow, TrEMBL automatic entries in blue, (www.uniprot.org/help/entry\_status), "Protein names" (www.uniprot.org/help/protein\_names), "Gene names" (www.uniprot.org/help/gene\_name), "Organism" (www.uniprot.org/help/organism-name), "Length" (protein sequence length in amino-acids) and "Subcellular location" (www.uniprot.org/help/subcellular\_location\_section). The selected download option is FASTA (Canonical) leads to the retrieval of the canonical sequences (www.uniprot.org/help/canonical\_and\_isoforms) of found entries in the FASTA format, without alternative isoforms.

```

# endpoint: https://sparql.uniprot.org/sparql
#
# query: retrieve ChEBI compounds similar to patulin
#         - their Rhea reactions
#         - and their enzymes as annotated in UniProtKB
#
PREFIX rdfs:<http://www.w3.org/2000/01/rdf-schema#>
PREFIX sachem:<http://bioinfo.uochb.cas.cz/rdf/v1.0/sachem#>
PREFIX idsm:<https://idsm.elixir-czech.cz/sparql/endpoint/>
PREFIX up:<http://purl.uniprot.org/core/>
PREFIX rh:<http://rdf.rhea-db.org/>

SELECT ?score ?chebi_compound ?name ?rhea_reaction ?uniprot_enzyme
WHERE {
  SERVICE <https://sparql.rhea-db.org/sparql>{
    #- section 1: idsm/sachem similarity search
    SERVICE <https://idsm.elixir-czech.cz/sparql/endpoint/chebi> {
      [sachem:compound ?chebi_compound; sachem:score ?score]
      sachem:similaritySearch [
        sachem:query "OC1OCC=C2OC(=O)C=C12";
        sachem:cutoff "8e-1"^^xsd:double ;
        sachem:aromaticityMode sachem:aromaticityDetect ;
        sachem:similarityRadius 1 ;
        sachem:tautomerMode sachem:ignoreTautomers
      ] .
    }
    #- section 2: Rhea reaction, to the similar chebi compounds
    ?chebi_compound up:name ?name .
    ?rhea_reaction rh:side/rh:contains/rh:compound/rh:chebi ?chebi_compound .
  }
  #- section 3: UniProt enzymes, catalyzing the Rhea reactions
  ?uniprot_enzyme
up:annotation/up:catalyticActivity/up:catalyzedReaction ?rhea_reaction .
}
ORDER BY DESC(?score)

```

#### Pseudo code:

```

# Perform a call to the Rhea SPARQL endpoint using "SERVICE"
#- 1: nested SERVICE call to the idsm:chebi endpoint from Rhea
Retrieve ChEBI compounds similar to patulin SMILES using
sachem:similaritySearch with a score threshold (sachem:cutoff) of 0.8
#- 2: from Rhea endpoint
Retrieve Rhea reactions (?rhea_reaction) involving the ChEBI compounds
{?chebi_compound} identified during step 1
#-3: from UniProt endpoint
Retrieve the UniProtKB enzymes (?uniprot_enzyme) annotated with
the ?rhea_reaction identified during step 2

```

**Supplementary Figure S7. Sample federated SPARQL query to retrieve enzymes known to metabolize compounds identical or similar to patulin.** The query is designed for the UniProt SPARQL endpoint and uses two nested SERVICE to the Rhea and IDSM SPARQL endpoints (see its graphical representation in Figure 5). To see SPARQL in action, simply copy paste the query into [sparql.uniprot.org/sparql](https://sparql.uniprot.org/sparql) and run it.

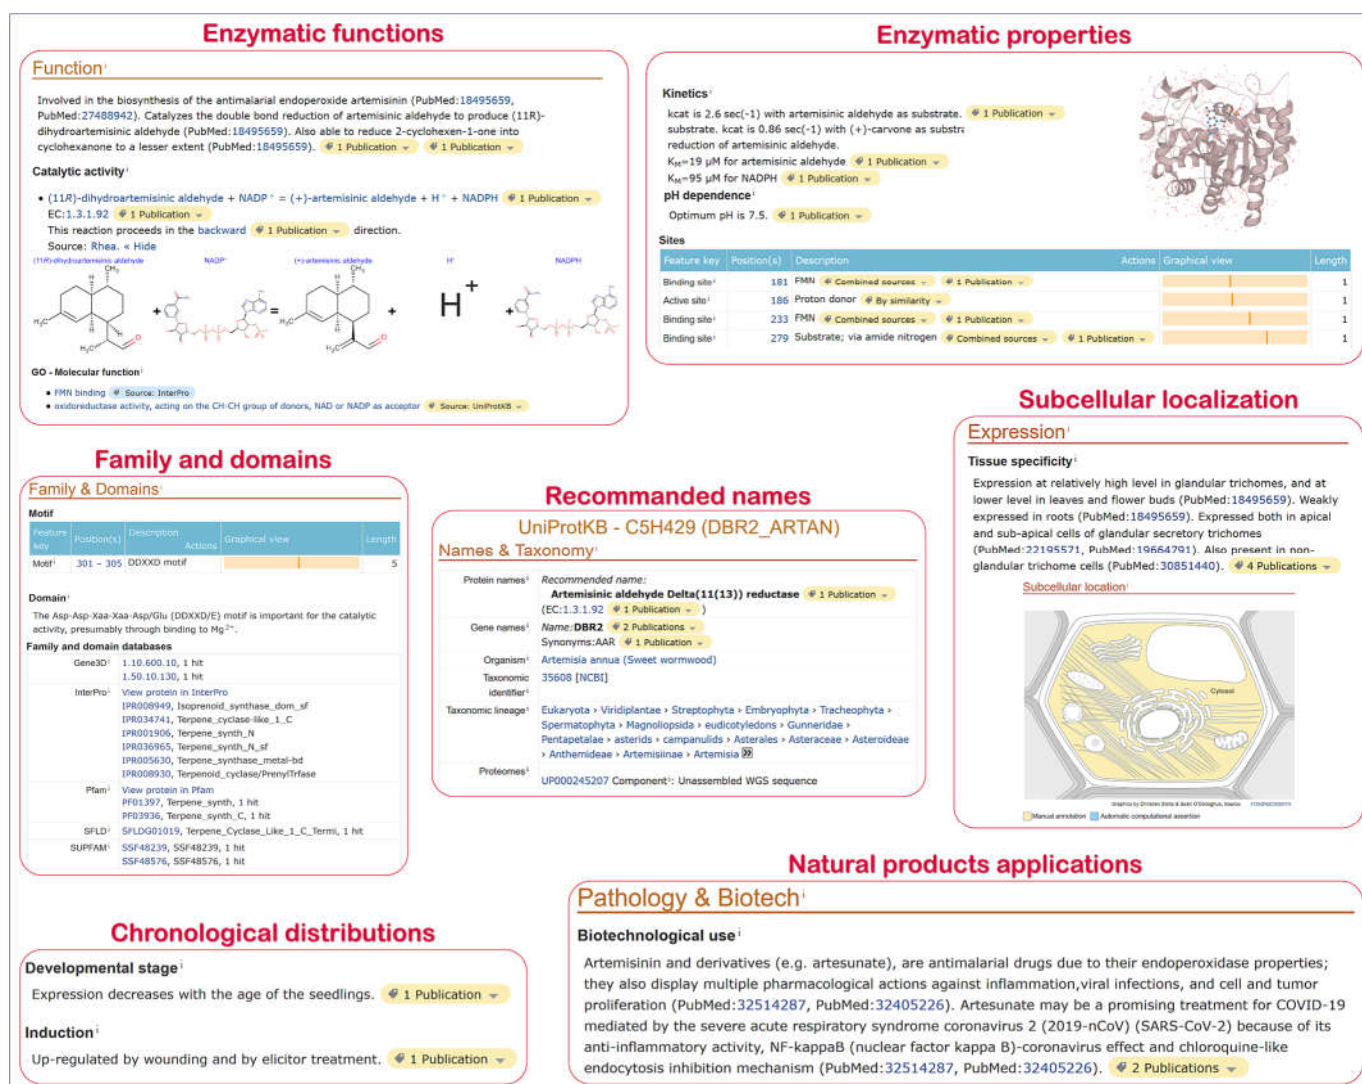

**Supplementary Figure S8. Schematic description of enzyme annotation in UniProtKB.** All aspects of biology and physical properties publicly available are reported and standardized during expert biocuration. Samples of UniProt.org display are grouped by following topics: “Recommended names”, “Enzymatic function”, “Enzymatic properties”, “Subcellular localization”, “Chronological distributions”, “Family and domains” and “Natural products applications”. Data are extracted from two proteins of *Artemisia annua*, beta-caryophyllene synthase QHS1 (UniProtKB:Q8SA63) and artemisinic aldehyde delta(11(13)) reductase DBR2 (UniProtKB:C5H429). Their complete annotations are available on uniprot.org: [www.uniprot.org/uniprot/Q8SA63](http://www.uniprot.org/uniprot/Q8SA63) and [www.uniprot.org/uniprot/C5H429](http://www.uniprot.org/uniprot/C5H429).
